# Supplementary material for: Chiral Assembly Preferences and Directing Effects in Supramolecular Two-Component Organogels
Source: PubMed Central journal article supplement (PMC6209267; doi:10.3390/gels4020031), 2018-03-29
Supplement: gels-04-00031-s001.pdf [file gels-04-00031-s001.pdf]

# Enhanced thermal stability and chiral directing effects in heterochiral self-assembled gels

William Edwards<sup>a</sup> and David K. Smith<sup>\*,a</sup>

## SUPPLEMENTARY INFORMATION

### Contents

- 1 Thermal Stability Data
- 2 Variable Temperature NMR Spectroscopy Data

## 1. Thermal Stability

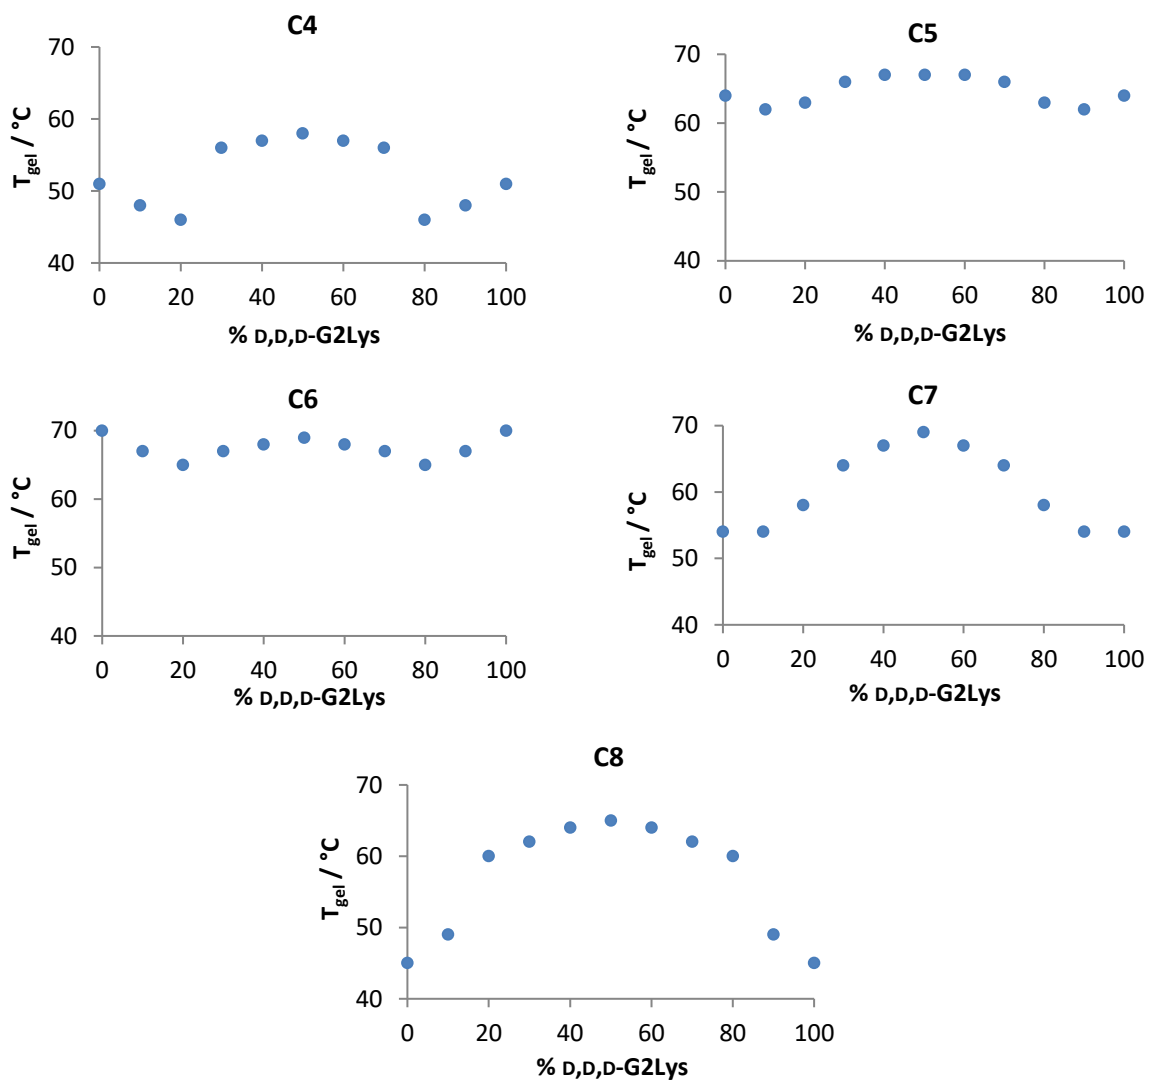

Figure S1. Effect of enantiomeric mixing on  $T_{gel}$ , as measured by tube inversion. Concentration of amine is 10 mM, and total concentration of dendron (D,D,D+L,L,L) is also 10 mM.

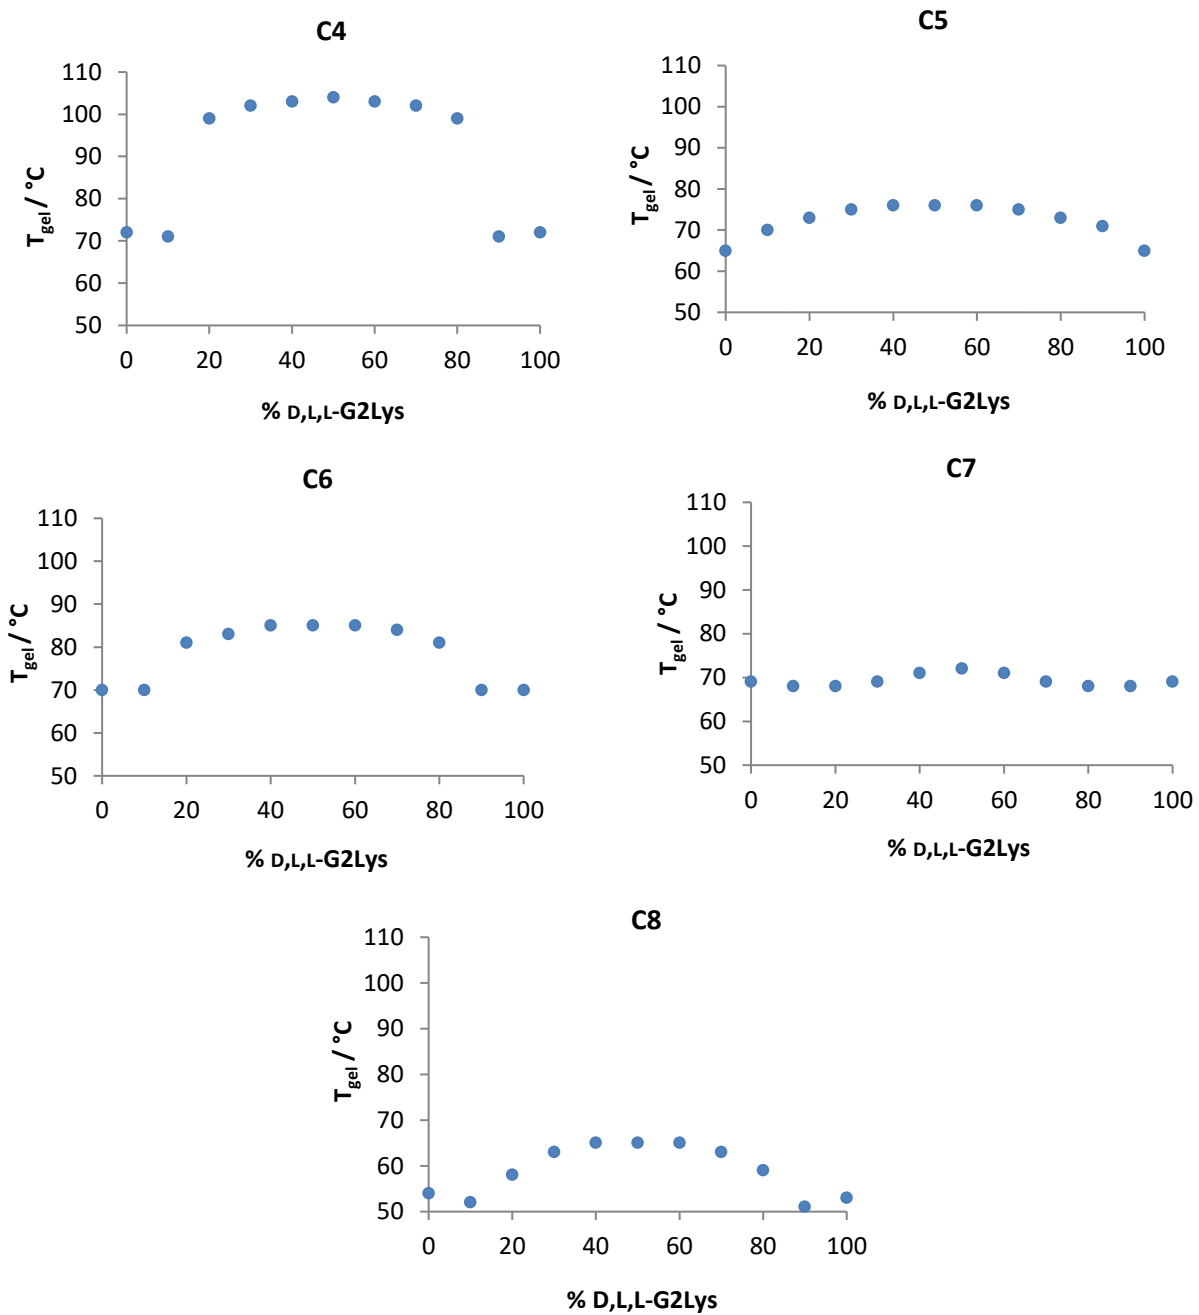

Figure S2. Effect of enantiomeric mixing on  $T_{gel}$ , as measured by tube inversion. Concentration of amine is 10 mM, and total concentration of dendron (D,L,L+L,D,D) is also 10 mM

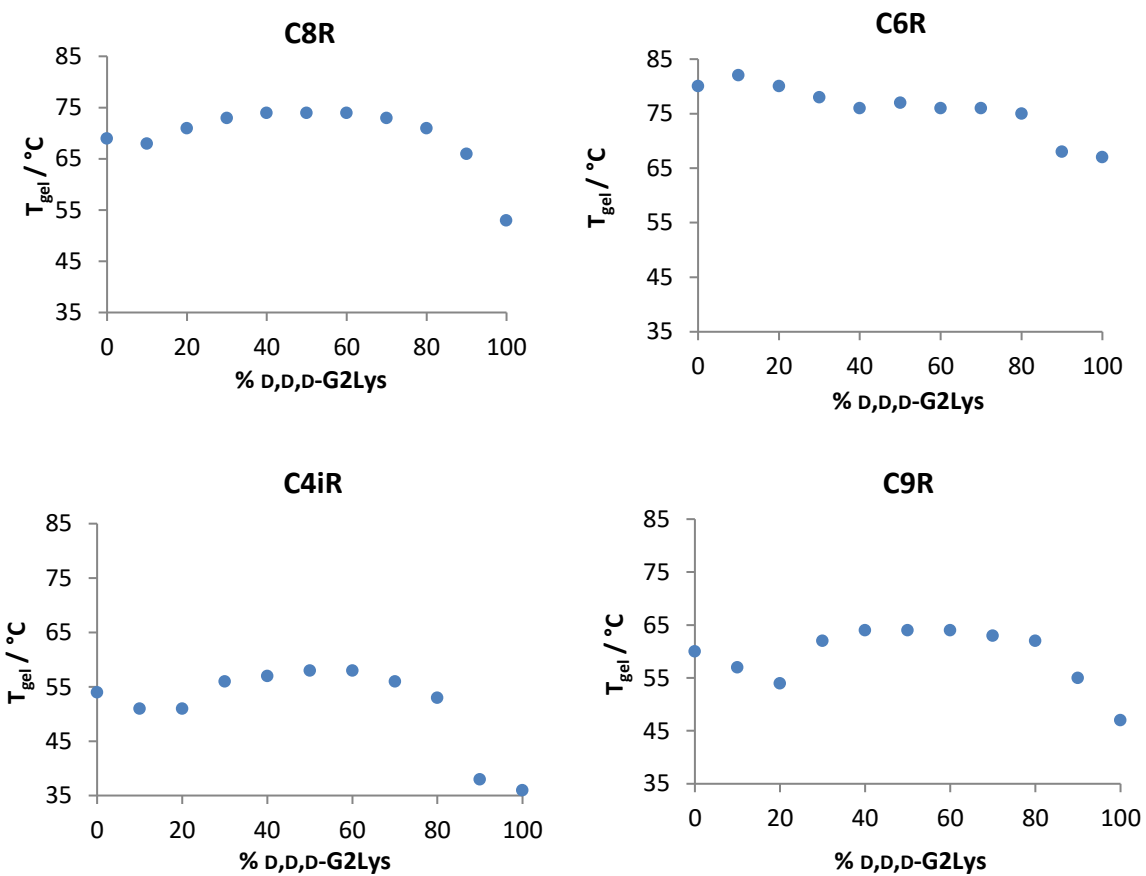

Figure S3. Effect of mixing L,L,L and D,D,D (total combined concentration 10 mM) on the  $T_{gel}$  value in the presence of different acyclic chiral amines.

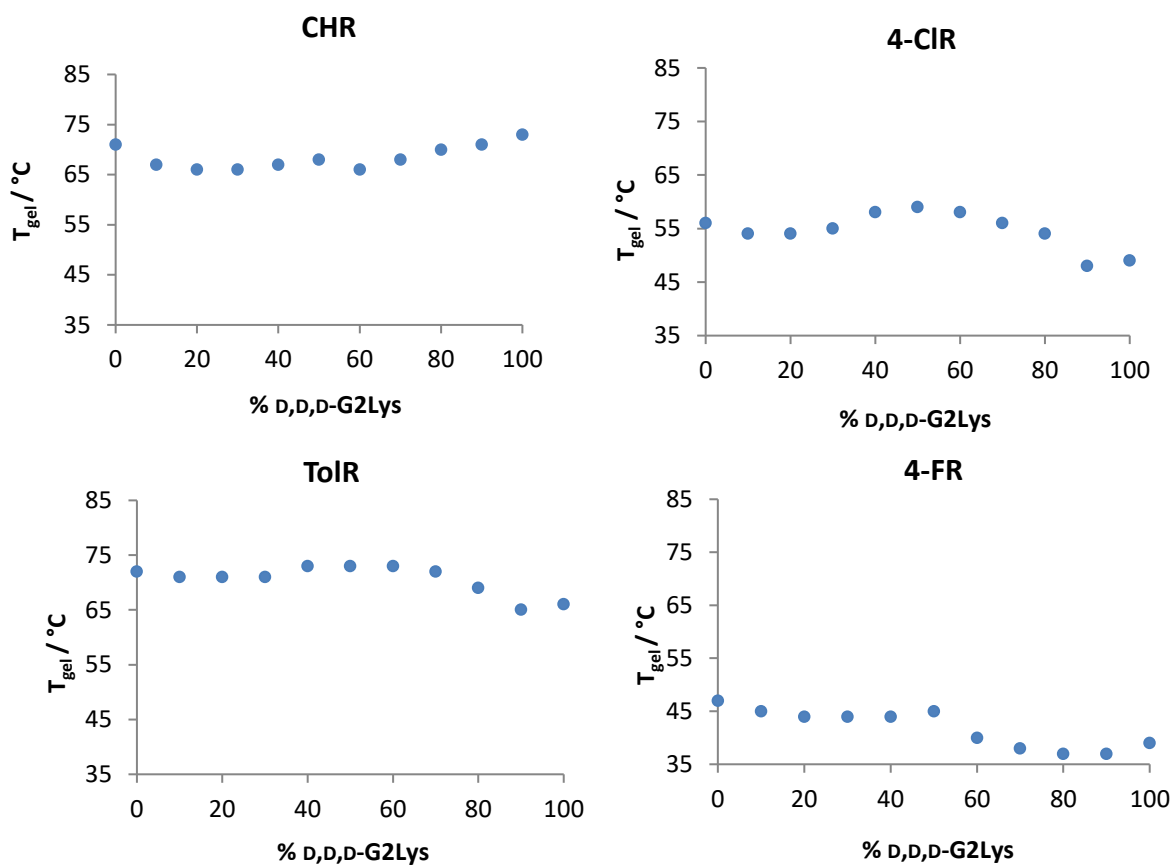

Figure S4. Effect of mixing L,L,L and D,D,D (total combined concentration 10 mM) on the  $T_{gel}$  value in the presence of different cyclic chiral amines.

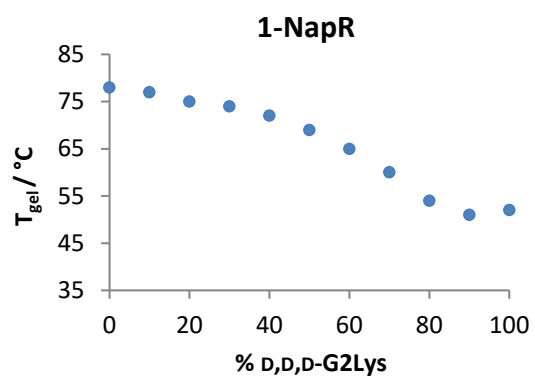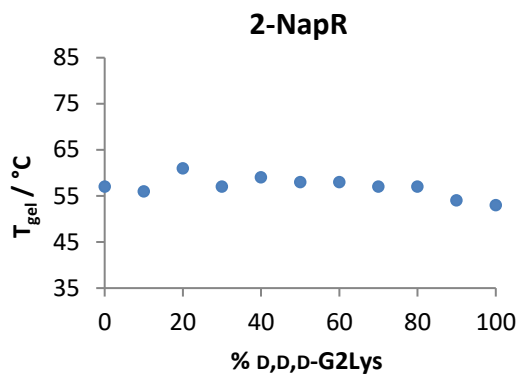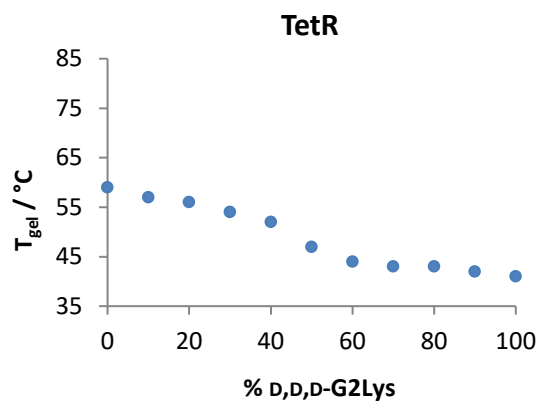

Figure S5. Effect of mixing L,L,L and D,D,D (total combined concentration, 10 mM) on the  $T_{gel}$  value in the presence of different hindered chiral amines (10 mM).

## 2. Variable Temperature NMR Spectroscopy Data

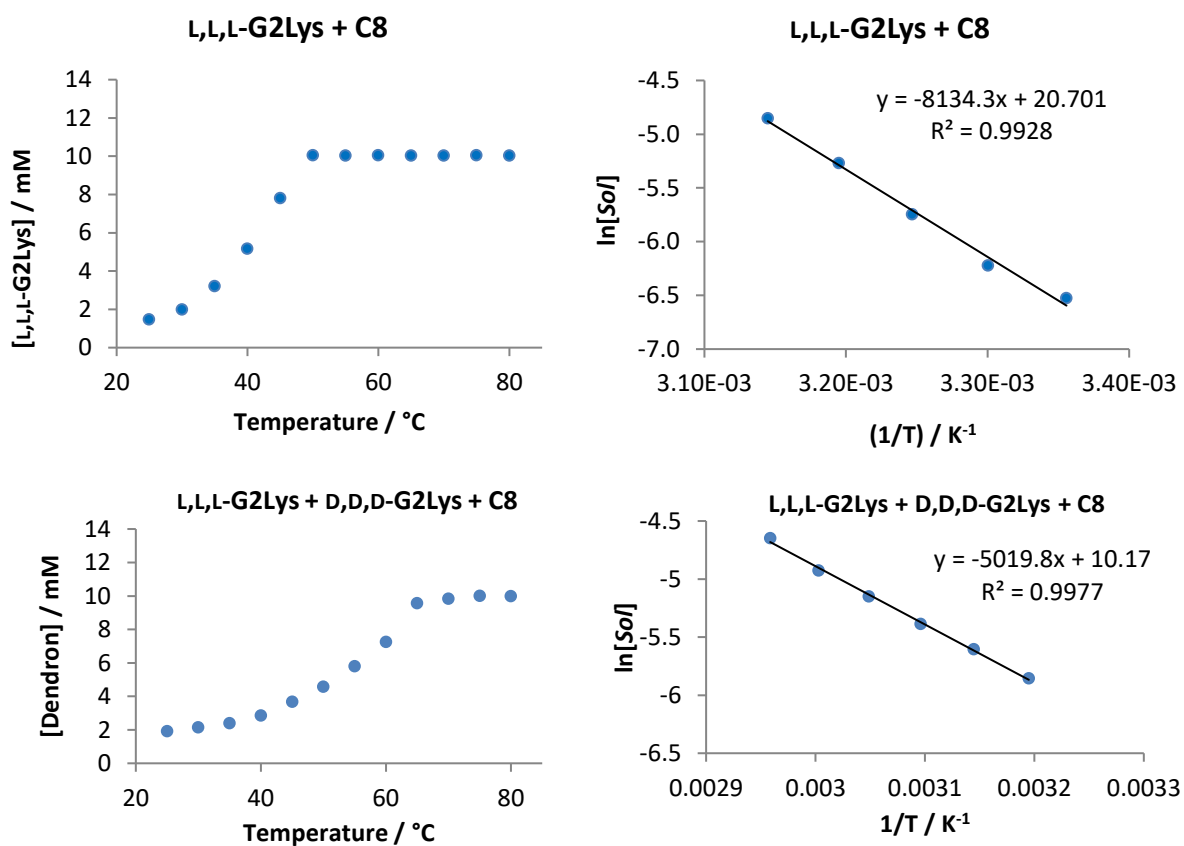

Figure S6. Concentration of lysine dendron visible in gels of **L,L,L-G2Lys**, or **L,L,L-G2Lys** and **D,D,D-G2Lys** with **C8** as temperature increases (solvent: toluene-*d*<sub>8</sub>). Van 't Hoff plots of gels formed from **L,L,L-G2Lys** or **L,L,L-G2Lys** and **D,D,D-G2Lys** with **C8**.

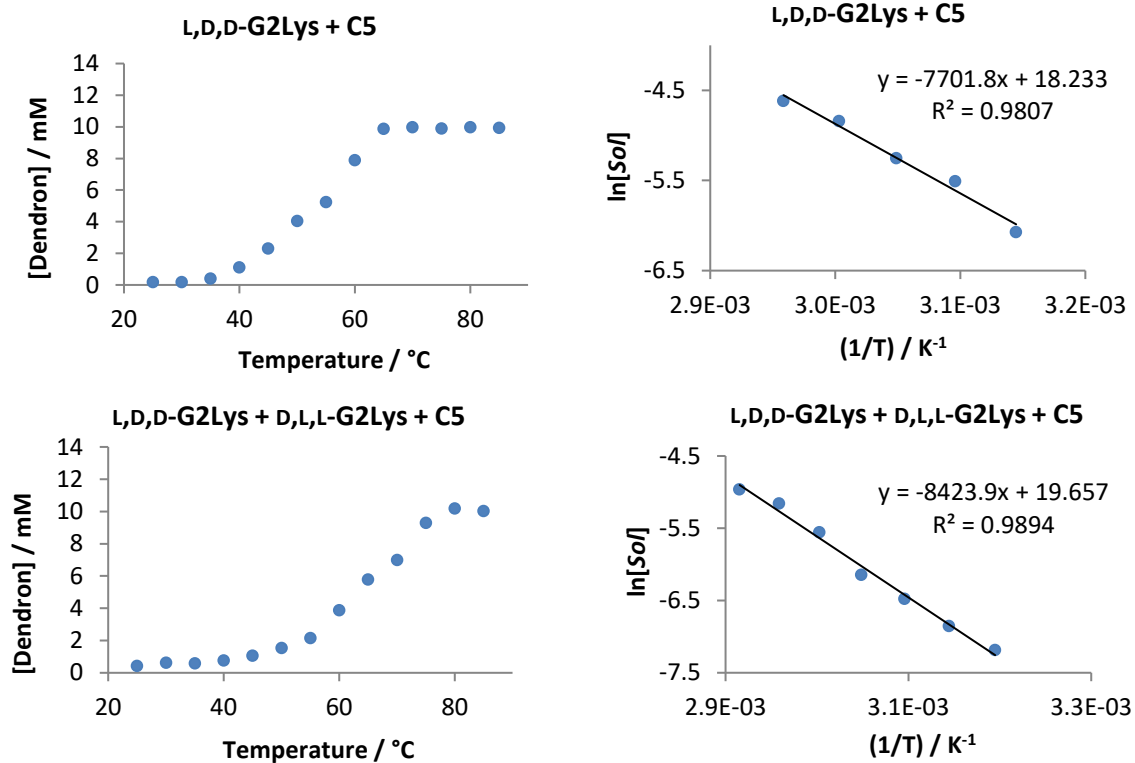

Figure S7. Concentration of lysine dendron visible in gels of **L,D,D-G2Lys**, or **L,D,D-G2Lys** and **D,L,L-G2Lys** with **C5** as temperature increases (solvent: toluene-*d*<sub>8</sub>). Van 't Hoff plots of gels formed from **L,D,D-G2Lys** or **L,D,D-G2Lys** and **D,L,L-G2Lys** with **C5**.



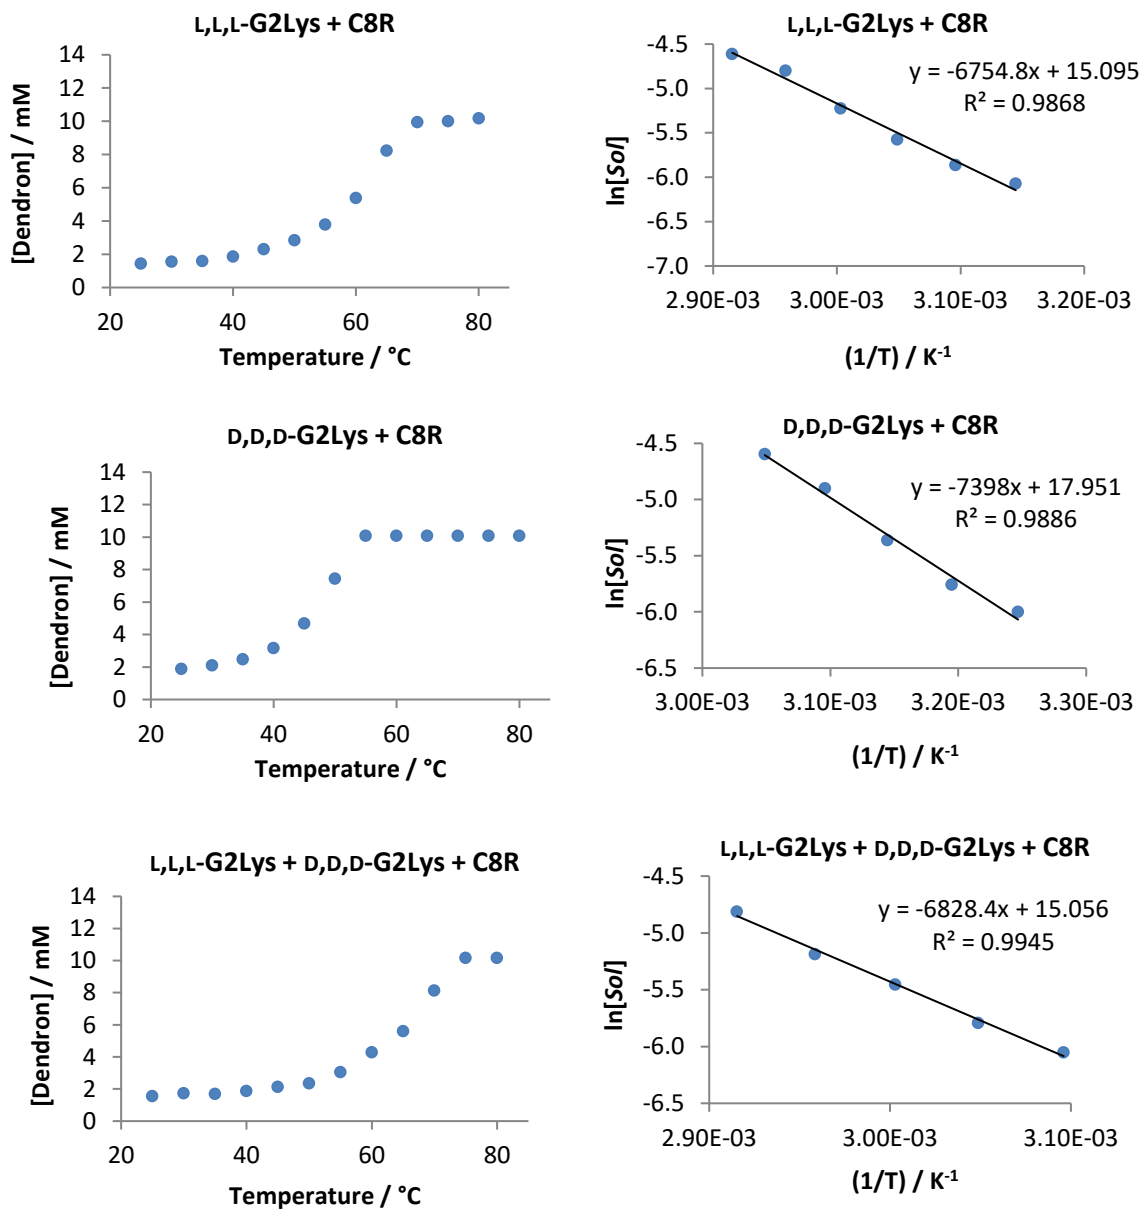

Figure S8. Concentration of lysine dendron visible in gels of **L,L,L-G2Lys**, or **D,D,D-G2Lys**, or **L,L,L-G2Lys** and **D,D,D-G2Lys** with **C8R** as temperature increases (solvent: toluene-*d*<sub>8</sub>). Van't Hoff plots of gels formed from **L,L,L-G2Lys** or **D,D,D-G2Lys** or **L,L,L-G2Lys** and **D,D,D-G2Lys** with **C8R**.
